# Supplementary material
Source: PubMed Central journal article supplement (PMC4410861)
Supplement: NIHMS681813-supplement-Appendix.pdf [file NIHMS681813-supplement-Appendix.pdf]

### Supplementary Online Content

Brauer CA, Coca-Perraillon M, Cutler DM, Rosen AB. Incidence and Mortality of Hip Fractures in the United States. *JAMA*. 2009;302(14):1573-1579.

eTable 1. Baseline Characteristics of Patients

eTable 2. Age-Adjusted Comorbid Conditions (Percent)

eTable 3. Mortality Models

This supplementary material has been provided by the authors to give readers additional information about their work.

**eTable 1. Baseline Characteristics of Patients\***

|                                  |      | Women     |           |           |           |           |           |           |           |           |           |           |           |           |           |           |           |           |           |           |       |
|----------------------------------|------|-----------|-----------|-----------|-----------|-----------|-----------|-----------|-----------|-----------|-----------|-----------|-----------|-----------|-----------|-----------|-----------|-----------|-----------|-----------|-------|
|                                  |      | 1986      | 1987      | 1988      | 1989      | 1990      | 1991      | 1992      | 1993      | 1994      | 1995      | 1996      | 1997      | 1998      | 1999      | 2000      | 2001      | 2002      | 2003      | 2004      | 2005  |
| N                                |      | 2729<br>6 | 2787<br>7 | 2836<br>8 | 2888<br>3 | 2980<br>7 | 3066<br>2 | 3136<br>8 | 3128<br>0 | 3330<br>0 | 3329<br>1 | 3370<br>3 | 3306<br>3 | 3202<br>7 | 3153<br>1 | 3069<br>7 | 3024<br>7 | 2902<br>5 | 2899<br>2 | 2821<br>4 | 27414 |
| <b>Age</b>                       |      |           |           |           |           |           |           |           |           |           |           |           |           |           |           |           |           |           |           |           |       |
| 65-74                            | N    | 4914      | 4976      | 4948      | 4905      | 4886      | 4987      | 5020      | 4788      | 5066      | 4961      | 4843      | 4610      | 4359      | 4209      | 4011      | 3767      | 3798      | 3674      | 3758      | 3703  |
|                                  | %    | 18.0      | 17.9      | 17.4      | 17.0      | 16.4      | 16.3      | 16.0      | 15.3      | 15.2      | 14.9      | 14.4      | 13.9      | 13.6      | 13.4      | 13.1      | 12.5      | 13.1      | 12.7      | 13.3      | 13.5  |
| 75-84                            | N    | 1161<br>0 | 1191<br>7 | 1210<br>5 | 1239<br>8 | 1268<br>0 | 1291<br>1 | 1311<br>8 | 1307<br>0 | 1371<br>4 | 1367<br>7 | 1387<br>4 | 1359<br>4 | 1323<br>2 | 1263<br>8 | 1241<br>7 | 1239<br>4 | 1174<br>2 | 1192<br>1 | 1155<br>0 | 11089 |
|                                  | %    | 42.5      | 42.8      | 42.7      | 42.9      | 42.5      | 42.1      | 41.8      | 41.8      | 41.2      | 41.1      | 41.2      | 41.1      | 41.3      | 40.1      | 40.5      | 41.0      | 40.5      | 41.1      | 40.9      | 40.5  |
| 85+                              | N    | 1077<br>2 | 1098<br>4 | 1131<br>5 | 1158<br>0 | 1224<br>1 | 1276<br>4 | 1323<br>0 | 1342<br>2 | 1452<br>0 | 1465<br>3 | 1498<br>6 | 1485<br>9 | 1443<br>6 | 1468<br>4 | 1426<br>9 | 1408<br>6 | 1348<br>5 | 1339<br>7 | 1290<br>6 | 12622 |
|                                  | %    | 39.5      | 39.4      | 39.9      | 40.1      | 41.1      | 41.6      | 42.2      | 42.9      | 43.6      | 44.0      | 44.5      | 44.9      | 45.1      | 46.6      | 46.5      | 46.6      | 46.5      | 46.2      | 45.7      | 46.0  |
| <b>Race</b>                      |      |           |           |           |           |           |           |           |           |           |           |           |           |           |           |           |           |           |           |           |       |
| Black                            | N    | 834       | 864       | 885       | 939       | 974       | 988       | 1016      | 1073      | 1102      | 1167      | 1139      | 1153      | 1116      | 1072      | 1056      | 1048      | 1057      | 985       | 952       | 909   |
|                                  | %    | 3.1       | 3.1       | 3.1       | 3.3       | 3.3       | 3.2       | 3.2       | 3.4       | 3.3       | 3.5       | 3.4       | 3.5       | 3.5       | 3.4       | 3.4       | 3.5       | 3.6       | 3.4       | 3.4       | 3.3   |
| Other                            | N    | 535       | 473       | 521       | 516       | 565       | 605       | 604       | 580       | 820       | 765       | 804       | 807       | 900       | 815       | 753       | 835       | 748       | 793       | 830       | 823   |
|                                  | %    | 2.0       | 1.7       | 1.8       | 1.8       | 1.9       | 2.0       | 1.9       | 1.9       | 2.5       | 2.3       | 2.4       | 2.4       | 2.8       | 2.6       | 2.5       | 2.8       | 2.6       | 2.7       | 2.9       | 3.0   |
| White                            | N    | 2592<br>7 | 2654<br>0 | 2696<br>2 | 2742<br>8 | 2826<br>8 | 2906<br>9 | 2974<br>8 | 2962<br>7 | 3137<br>8 | 3135<br>9 | 3176<br>0 | 3110<br>3 | 3001<br>1 | 2964<br>4 | 2888<br>8 | 2836<br>4 | 2722<br>0 | 2721<br>4 | 2643<br>2 | 25682 |
|                                  | %    | 95.0      | 95.2      | 95.0      | 95.0      | 94.8      | 94.8      | 94.8      | 94.7      | 94.2      | 94.2      | 94.2      | 94.1      | 93.7      | 94.0      | 94.1      | 93.8      | 93.8      | 93.9      | 93.7      | 93.7  |
| <b>Region</b>                    |      |           |           |           |           |           |           |           |           |           |           |           |           |           |           |           |           |           |           |           |       |
| Midwest                          | N    | 7378      | 7336      | 7400      | 7387      | 7907      | 8086      | 8270      | 8170      | 8863      | 8940      | 9037      | 8898      | 8644      | 8449      | 8076      | 8177      | 7735      | 7808      | 7592      | 7433  |
|                                  | %    | 27.0      | 26.3      | 26.1      | 25.6      | 26.5      | 26.4      | 26.4      | 26.1      | 26.6      | 26.9      | 26.8      | 26.9      | 27.0      | 26.8      | 26.3      | 27.0      | 26.7      | 26.9      | 26.9      | 27.1  |
| Northeast                        | N    | 6012      | 6163      | 6291      | 6510      | 6662      | 6745      | 7027      | 6985      | 7389      | 7145      | 7301      | 7073      | 6773      | 6543      | 6347      | 6066      | 5908      | 5684      | 5496      | 5193  |
|                                  | %    | 22.0      | 22.1      | 22.2      | 22.5      | 22.4      | 22.0      | 22.4      | 22.3      | 22.2      | 21.5      | 21.7      | 21.4      | 21.2      | 20.8      | 20.7      | 20.1      | 20.4      | 19.6      | 19.5      | 18.9  |
| South                            | N    | 9630      | 1000      | 1040      | 1056      | 1089      | 1149      | 1170      | 1174      | 1264      | 1278      | 1295      | 1288      | 1258      | 1255      | 1234      | 1207      | 1161      | 1168      | 1151      | 11110 |
|                                  | %    | 35.3      | 35.9      | 36.7      | 36.6      | 37.5      | 37.3      | 37.5      | 38.0      | 38.4      | 38.5      | 39.0      | 39.3      | 39.8      | 40.2      | 39.9      | 40.0      | 40.3      | 40.8      | 40.5      | 40.5  |
| West                             | N    | 4276      | 4371      | 4274      | 4426      | 4339      | 4335      | 4365      | 4384      | 4405      | 4419      | 4407      | 4206      | 4023      | 3986      | 3927      | 3932      | 3766      | 3815      | 3611      | 3678  |
|                                  | %    | 15.7      | 15.7      | 15.1      | 15.3      | 14.6      | 14.1      | 13.9      | 14.0      | 13.2      | 13.3      | 13.1      | 12.7      | 12.6      | 12.6      | 12.8      | 13.0      | 13.0      | 13.2      | 12.8      | 13.4  |
| <b>Discharge Destination</b>     |      |           |           |           |           |           |           |           |           |           |           |           |           |           |           |           |           |           |           |           |       |
| Home, self-care                  | N    | 1012<br>3 | 9426      | 8919      | 8262      | 7510      | 6696      | 6023      | 5321      | 5404      | 4921      | 4567      | 4214      | 3620      | 3143      | 2805      | 2651      | 2096      | 1752      | 1252      | 1241  |
|                                  | %    | 37.1      | 33.8      | 31.4      | 28.6      | 25.2      | 21.8      | 19.2      | 17.0      | 16.2      | 14.8      | 13.6      | 12.8      | 11.3      | 10.0      | 9.1       | 8.8       | 7.2       | 6.0       | 4.4       | 4.5   |
| Intermediate Care Facility (ICF) | N    | 2548      | 2584      | 2593      | 2504      | 2551      | 2549      | 2429      | 2228      | 2341      | 2177      | 1966      | 1885      | 1935      | 1991      | 1921      | 1801      | 1288      | 954       | 427       | 337   |
|                                  | %    | 9.3       | 9.3       | 9.1       | 8.7       | 8.6       | 8.3       | 7.7       | 7.1       | 7.0       | 6.5       | 5.8       | 5.7       | 6.0       | 6.3       | 6.3       | 6.0       | 4.4       | 3.3       | 1.5       | 1.2   |
| Other                            | N    | 4085      | 4653      | 4770      | 5222      | 5201      | 5329      | 5306      | 5308      | 4592      | 4260      | 3996      | 3630      | 3575      | 3769      | 3514      | 3553      | 3640      | 3339      | 3323      | 3135  |
|                                  | %    | 15.0      | 16.7      | 16.8      | 18.1      | 17.5      | 17.4      | 16.9      | 17.0      | 13.8      | 12.8      | 11.9      | 11.0      | 11.2      | 12.0      | 11.5      | 11.8      | 12.5      | 11.5      | 11.8      | 11.4  |
| Other type of inpatient facility | N    | 1594      | 1952      | 2264      | 2639      | 3354      | 4074      | 4730      | 4942      | 5710      | 5900      | 6014      | 5975      | 5916      | 6022      | 6410      | 6538      | 7096      | 7561      | 7712      | 7718  |
|                                  | %    | 5.8       | 7.0       | 8.0       | 9.1       | 11.3      | 13.3      | 15.1      | 15.8      | 17.2      | 17.7      | 17.8      | 18.1      | 18.5      | 19.1      | 20.9      | 21.6      | 24.5      | 26.1      | 27.3      | 28.2  |
| Skilled Nursing Facility (SNF)   | N    | 8946      | 9262      | 9822      | 1025      | 1119      | 1201      | 1288      | 1348      | 1525      | 1603      | 1716      | 1735      | 1698      | 1660      | 1604      | 1570      | 1490      | 1538      | 1550      | 14983 |
|                                  | %    | 32.8      | 33.2      | 34.6      | 35.5      | 37.5      | 39.2      | 41.1      | 43.1      | 45.8      | 48.2      | 50.9      | 52.5      | 53.0      | 52.7      | 52.3      | 51.9      | 51.4      | 53.1      | 54.9      | 54.7  |
| <b>Length of stay</b>            | Days |           |           |           |           |           |           |           |           |           |           |           |           |           |           |           |           |           |           |           |       |
| Median                           |      | 12.0      | 12.0      | 11.0      | 11.0      | 10.0      | 10.0      | 9.0       | 8.0       | 7.0       | 7.0       | 6.0       | 6.0       | 5.0       | 5.0       | 5.0       | 5.0       | 5.0       | 5.0       | 5.0       | 5.0   |

|                                  |      |             |             |             |             |             |             |             |             |             |             |             |             |             |             |             |             |             |             |             |             |
|----------------------------------|------|-------------|-------------|-------------|-------------|-------------|-------------|-------------|-------------|-------------|-------------|-------------|-------------|-------------|-------------|-------------|-------------|-------------|-------------|-------------|-------------|
| 25 <sup>th</sup> percentile      |      | 9.0         | 8.0         | 8.0         | 8.0         | 7.0         | 7.0         | 7.0         | 6.0         | 5.0         | 5.0         | 4.0         | 4.0         | 4.0         | 4.0         | 4.0         | 4.0         | 4.0         | 4.0         | 4.0         | 4.0         |
| 75 <sup>th</sup> percentile      |      | 16.0        | 16.0        | 15          | 15.0        | 14.0        | 14.0        | 13.0        | 12.0        | 11.0        | 9.0         | 9.0         | 8.0         | 8.0         | 8.0         | 8.0         | 8.0         | 8.0         | 8.0         | 7.0         | 7.0         |
| <b>Men</b>                       |      |             |             |             |             |             |             |             |             |             |             |             |             |             |             |             |             |             |             |             |             |
|                                  |      | <b>1986</b> | <b>1987</b> | <b>1988</b> | <b>1989</b> | <b>1990</b> | <b>1991</b> | <b>1992</b> | <b>1993</b> | <b>1994</b> | <b>1995</b> | <b>1996</b> | <b>1997</b> | <b>1998</b> | <b>1999</b> | <b>2000</b> | <b>2001</b> | <b>2002</b> | <b>2003</b> | <b>2004</b> | <b>2005</b> |
| N                                |      | 7402        | 7641        | 7898        | 7931        | 8103        | 8566        | 8942        | 9061        | 9512        | 9673        | 9574        | 9790        | 9424        | 9659        | 9589        | 9453        | 9357        | 9464        | 9227        | 9406        |
| <b>Age</b>                       |      |             |             |             |             |             |             |             |             |             |             |             |             |             |             |             |             |             |             |             |             |
| 65-74                            | N    | 1807        | 1927        | 1824        | 1842        | 1935        | 1865        | 1906        | 2018        | 2051        | 2024        | 2059        | 2067        | 1937        | 1948        | 1797        | 1821        | 1869        | 1873        | 1788        | 1811        |
|                                  | %    | 24.4        | 25.2        | 23.1        | 23.2        | 23.9        | 21.8        | 21.3        | 22.3        | 21.6        | 20.9        | 21.5        | 21.1        | 20.6        | 20.2        | 18.7        | 19.3        | 20.0        | 19.8        | 19.4        | 19.3        |
| 75-84                            |      | 3198        | 3254        | 3520        | 3551        | 3565        | 3845        | 4019        | 3929        | 4270        | 4257        | 4215        | 4207        | 4096        | 4200        | 4275        | 4106        | 4056        | 4195        | 4058        | 4167        |
|                                  |      | 43.2        | 42.59       | 44.57       | 44.77       | 44          | 44.89       | 44.95       | 43.36       | 44.89       | 44.01       | 44.03       | 42.97       | 43.46       | 43.48       | 44.58       | 43.44       | 43.35       | 44.33       | 43.98       | 44.3        |
| 85+                              |      | 2397        | 2460        | 2554        | 2538        | 2603        | 2856        | 3017        | 3114        | 3191        | 3392        | 3300        | 3516        | 3391        | 3511        | 3517        | 3526        | 3432        | 3396        | 3381        | 3428        |
|                                  |      | 32.4        | 32.2        | 32.3        | 32.0        | 32.1        | 33.3        | 33.7        | 34.4        | 33.6        | 35.1        | 34.5        | 35.9        | 36.0        | 36.4        | 36.7        | 37.3        | 36.7        | 35.9        | 36.6        | 36.4        |
| <b>Race</b>                      |      |             |             |             |             |             |             |             |             |             |             |             |             |             |             |             |             |             |             |             |             |
| Black                            | N    | 331         | 337         | 369         | 331         | 341         | 384         | 423         | 389         | 418         | 433         | 433         | 426         | 425         | 387         | 417         | 431         | 409         | 418         | 433         | 380         |
|                                  | %    | 4.5         | 4.4         | 4.7         | 4.2         | 4.2         | 4.5         | 4.7         | 4.3         | 4.4         | 4.5         | 4.5         | 4.4         | 4.5         | 4.0         | 4.4         | 4.6         | 4.4         | 4.4         | 4.7         | 4.0         |
| Other                            |      | 264         | 252         | 239         | 285         | 258         | 264         | 294         | 257         | 269         | 254         | 251         | 246         | 240         | 280         | 290         | 285         | 263         | 252         | 260         | 303         |
|                                  |      | 3.6         | 3.3         | 3.0         | 3.6         | 3.2         | 3.1         | 3.3         | 2.8         | 2.8         | 2.6         | 2.6         | 2.5         | 2.6         | 2.9         | 3.0         | 3.0         | 2.8         | 2.7         | 2.8         | 3.2         |
| White                            |      | 6807        | 7052        | 7290        | 7315        | 7504        | 7918        | 8225        | 8415        | 8825        | 8986        | 8890        | 9118        | 8759        | 8992        | 8882        | 8737        | 8685        | 8794        | 8534        | 8723        |
|                                  |      | 92.0        | 92.3        | 92.3        | 92.2        | 92.6        | 92.4        | 92.0        | 92.9        | 92.8        | 92.9        | 92.9        | 93.1        | 92.9        | 93.1        | 92.6        | 92.4        | 92.8        | 92.9        | 92.5        | 92.7        |
| <b>Region</b>                    |      |             |             |             |             |             |             |             |             |             |             |             |             |             |             |             |             |             |             |             |             |
| Midwest                          | N    | 2007        | 2078        | 2144        | 2101        | 2195        | 2369        | 2466        | 2528        | 2623        | 2736        | 2657        | 2700        | 2616        | 2670        | 2705        | 2595        | 2575        | 2571        | 2587        | 2531        |
|                                  | %    | 27.1        | 27.2        | 27.2        | 26.5        | 27.1        | 27.7        | 27.6        | 27.9        | 27.6        | 28.3        | 27.8        | 27.6        | 27.8        | 27.6        | 28.2        | 27.5        | 27.5        | 27.2        | 28.0        | 26.9        |
| Northeast                        |      | 1560        | 1603        | 1712        | 1729        | 1713        | 1762        | 1877        | 1833        | 1956        | 1925        | 1946        | 1944        | 1867        | 1888        | 1868        | 1792        | 1786        | 1775        | 1652        | 1715        |
|                                  |      | 21.1        | 21.0        | 21.7        | 21.8        | 21.1        | 20.6        | 21.0        | 20.2        | 20.6        | 19.9        | 20.3        | 19.9        | 19.8        | 19.6        | 19.5        | 19.0        | 19.1        | 18.8        | 17.9        | 18.2        |
| South                            |      | 2564        | 2664        | 2762        | 2752        | 2917        | 3056        | 3241        | 3293        | 3546        | 3592        | 3587        | 3661        | 3585        | 3644        | 3654        | 3675        | 3612        | 3704        | 3640        | 3722        |
|                                  |      | 34.6        | 34.9        | 35.0        | 34.7        | 36.0        | 35.7        | 36.2        | 36.3        | 37.3        | 37.1        | 37.5        | 37.4        | 38.0        | 37.7        | 38.1        | 38.9        | 38.6        | 39.1        | 39.5        | 39.6        |
| West                             |      | 1271        | 1296        | 1280        | 1349        | 1278        | 1379        | 1358        | 1407        | 1387        | 1420        | 1384        | 1485        | 1356        | 1457        | 1362        | 1391        | 1384        | 1414        | 1348        | 1438        |
|                                  |      | 17.2        | 17.0        | 16.2        | 17.0        | 15.8        | 16.1        | 15.2        | 15.5        | 14.6        | 14.7        | 14.5        | 15.2        | 14.4        | 15.1        | 14.2        | 14.7        | 14.8        | 14.9        | 14.6        | 15.3        |
| <b>Discharge Destination</b>     |      |             |             |             |             |             |             |             |             |             |             |             |             |             |             |             |             |             |             |             |             |
| Home, self-care                  | N    | 2729        | 2723        | 2568        | 2392        | 2193        | 1947        | 1862        | 1647        | 1699        | 1514        | 1402        | 1360        | 1176        | 1046        | 1080        | 910         | 761         | 695         | 520         | 493         |
|                                  | %    | 36.9        | 35.6        | 32.5        | 30.2        | 27.1        | 22.7        | 20.8        | 18.2        | 17.9        | 15.7        | 14.6        | 13.9        | 12.5        | 10.8        | 11.3        | 9.6         | 8.1         | 7.3         | 5.6         | 5.2         |
| Intermediate Care Facility (ICF) |      | 605         | 589         | 610         | 551         | 651         | 633         | 635         | 555         | 639         | 575         | 533         | 465         | 437         | 524         | 604         | 479         | 435         | 283         | 138         | 116         |
|                                  |      | 8.2         | 7.7         | 7.7         | 7.0         | 8.0         | 7.4         | 7.1         | 6.1         | 6.7         | 5.9         | 5.6         | 4.8         | 4.6         | 5.4         | 6.3         | 5.1         | 4.7         | 3.0         | 1.5         | 1.2         |
| Other                            |      | 1509        | 1677        | 1631        | 1827        | 1791        | 1862        | 1897        | 1856        | 1740        | 1624        | 1502        | 1471        | 1389        | 1557        | 1523        | 1512        | 1511        | 1474        | 1407        | 1414        |
|                                  |      | 20.4        | 22.0        | 20.7        | 23.0        | 22.1        | 21.7        | 21.2        | 20.5        | 18.3        | 16.8        | 15.7        | 15.0        | 14.7        | 16.1        | 15.9        | 16.0        | 16.2        | 15.6        | 15.3        | 15.0        |
| Other type of inpatient facility |      | 446         | 494         | 612         | 699         | 889         | 1044        | 1237        | 1392        | 1495        | 1602        | 1652        | 1706        | 1685        | 1786        | 1891        | 2035        | 2239        | 2497        | 2557        | 2760        |
|                                  |      | 6.0         | 6.5         | 7.8         | 8.8         | 11.0        | 12.2        | 13.8        | 15.4        | 15.7        | 16.6        | 17.3        | 17.4        | 17.9        | 18.5        | 19.7        | 21.5        | 23.9        | 26.4        | 27.7        | 29.3        |
| Skilled Nursing Facility (SNF)   |      | 2113        | 2158        | 2477        | 2462        | 2579        | 3080        | 3311        | 3611        | 3939        | 4358        | 4485        | 4788        | 4737        | 4746        | 4491        | 4517        | 4411        | 4515        | 4605        | 4623        |
|                                  |      | 28.6        | 28.2        | 31.4        | 31.0        | 31.8        | 36.0        | 37.0        | 39.9        | 41.4        | 45.1        | 46.9        | 48.9        | 50.3        | 49.1        | 46.8        | 47.8        | 47.1        | 47.7        | 49.9        | 49.2        |
| <b>Length of stay</b>            | Days |             |             |             |             |             |             |             |             |             |             |             |             |             |             |             |             |             |             |             |             |
| Median                           |      | 12.0        | 12.0        | 11.0        | 11.0        | 11.0        | 10.0        | 9.0         | 8.0         | 8.0         | 7.0         | 6.0         | 6.0         | 6.0         | 6.0         | 6.0         | 6.0         | 6.0         | 6.0         | 6.0         | 6.0         |
| 25 <sup>th</sup> percentile      |      | 9.0         | 8.0         | 8.0         | 8.0         | 7.0         | 7.0         | 7.0         | 6.0         | 5.0         | 5.0         | 4.0         | 4.0         | 4.0         | 4.0         | 4.0         | 4.0         | 4.0         | 4.0         | 4.0         | 4.0         |
| 75 <sup>th</sup> percentile      |      | 18.0        | 17.0        | 16.0        | 17.0        | 16.0        | 15.0        | 14.0        | 13.0        | 11.0        | 10.0        | 9.0         | 9.0         | 9.0         | 9.0         | 9.0         | 9.0         | 9.0         | 9.0         | 8.0         | 8.0         |

\* Baseline characteristics are number / percentages unless otherwise indicated. Data are based on a 20% sample of Medicare claims. Q1 and Q3 are the first and third quintile, respectively.

**eTable 2. Age-Adjusted Comorbid Conditions (Percent)**

|                                 | Men   |      |      |      |      |      |      |      |      |      |      |      |      |      |      |      |      |      |      |      |      |
|---------------------------------|-------|------|------|------|------|------|------|------|------|------|------|------|------|------|------|------|------|------|------|------|------|
|                                 | 1986  | 1987 | 1988 | 1989 | 1990 | 1991 | 1992 | 1993 | 1994 | 1995 | 1996 | 1997 | 1998 | 1999 | 2000 | 2001 | 2002 | 2003 | 2004 | 2005 |      |
| Acute/old myocardial infarction | 3.5   | 5.1  | 4.8  | 4.8  | 4.3  | 4.6  | 5.6  | 7.1  | 7.9  | 8.6  | 9.8  | 9.8  | 10.8 | 12.2 | 12.4 | 12.6 | 13.5 | 14.0 | 13.7 | 12.9 | 12.5 |
| Cancer and metastatic carcinoma | 7.1   | 8.4  | 8.8  | 9.5  | 9.5  | 9.5  | 10.5 | 10.9 | 12.1 | 11.9 | 12.6 | 12.4 | 12.8 | 13.6 | 13.5 | 14.4 | 14.0 | 13.7 | 13.6 | 13.4 | 13.4 |
| Cerebrovascular disease         | 11.9  | 13.6 | 14.3 | 13.5 | 14.6 | 14.8 | 15.9 | 16.6 | 17.7 | 19.5 | 20.5 | 18.9 | 15.2 | 14.2 | 14.1 | 13.7 | 13.6 | 13.0 | 12.1 | 12.1 | 12.1 |
| Chronic pulmonary disease       | 21.2  | 23.8 | 24.6 | 26.5 | 25.9 | 26.9 | 28.3 | 30.9 | 30.4 | 31.9 | 32.6 | 32.7 | 33.1 | 32.6 | 33.1 | 33.5 | 34.7 | 34.6 | 34.0 | 34.5 | 34.5 |
| Chronic renal failure           | 3.1   | 3.6  | 3.2  | 3.6  | 3.8  | 3.9  | 4.5  | 5.1  | 5.4  | 5.8  | 5.5  | 5.4  | 5.7  | 6.6  | 6.8  | 7.6  | 7.7  | 8.1  | 7.9  | 10.8 | 10.8 |
| Congestive heart failure        | 11.4  | 13.9 | 14.9 | 15.1 | 16.2 | 17.0 | 18.9 | 21.8 | 21.6 | 23.1 | 24.0 | 24.4 | 26.0 | 25.9 | 26.4 | 26.5 | 27.8 | 28.4 | 29.4 | 28.9 | 28.9 |
| Dementia                        | 5.1   | 6.6  | 7.0  | 8.2  | 9.3  | 10.2 | 12.3 | 13.8 | 15.8 | 18.0 | 17.8 | 13.6 | 12.3 | 11.1 | 10.7 | 9.7  | 9.1  | 7.8  | 7.9  | 7.3  | 7.3  |
| Diabetes with/without sequelae  | 8.8   | 9.5  | 10.4 | 11.0 | 11.9 | 12.1 | 13.3 | 13.5 | 15.2 | 16.1 | 17.0 | 16.9 | 18.5 | 19.7 | 19.9 | 21.3 | 22.3 | 23.5 | 24.8 | 26.6 | 26.6 |
| Moderate/severe liver disease   | 0.1   | 0.2  | 0.3  | 0.2  | 0.3  | 0.3  | 0.2  | 0.3  | 0.3  | 0.4  | 0.4  | 0.4  | 0.4  | 0.4  | 0.4  | 0.4  | 0.4  | 0.3  | 0.3  | 0.3  | 0.3  |
| Paralysis                       | 2.7   | 3.1  | 3.5  | 3.5  | 4.0  | 3.7  | 4.3  | 4.8  | 5.3  | 5.6  | 6.1  | 5.0  | 2.5  | 1.9  | 1.7  | 1.8  | 1.8  | 1.8  | 1.6  | 1.6  | 1.6  |
| Peripheral vascular disease     | 2.9   | 3.6  | 4.0  | 4.0  | 4.3  | 4.1  | 5.3  | 5.9  | 7.1  | 7.6  | 7.9  | 8.3  | 9.0  | 9.3  | 9.5  | 10.5 | 11.1 | 10.9 | 10.7 | 10.3 | 10.3 |
| Rheumatologic disease           | 1.2   | 1.4  | 1.3  | 1.3  | 1.2  | 1.3  | 1.4  | 1.4  | 1.8  | 1.8  | 2.3  | 2.1  | 2.2  | 2.0  | 2.3  | 2.0  | 2.1  | 2.3  | 2.1  | 2.1  | 2.1  |
| Ulcer disease                   | 2.4   | 3.0  | 3.0  | 3.0  | 2.7  | 3.5  | 3.6  | 4.0  | 4.6  | 5.0  | 5.1  | 4.5  | 4.5  | 4.0  | 4.3  | 4.6  | 4.5  | 3.8  | 3.8  | 3.4  | 3.4  |
| Chronic liver disease/cirrhosis | 0.5   | 0.4  | 0.6  | 0.7  | 0.7  | 0.6  | 0.6  | 0.7  | 0.8  | 0.8  | 0.8  | 0.8  | 0.9  | 0.7  | 0.8  | 0.9  | 0.9  | 0.9  | 0.8  | 0.9  | 0.9  |
|                                 | Women |      |      |      |      |      |      |      |      |      |      |      |      |      |      |      |      |      |      |      |      |
| Acute/old myocardial infarction | 2.9   | 3.6  | 3.6  | 3.7  | 3.4  | 3.7  | 4.0  | 4.8  | 5.7  | 6.1  | 6.5  | 6.8  | 7.5  | 7.9  | 8.5  | 8.8  | 9.4  | 9.1  | 9.2  | 9.2  | 9.2  |
| Cancer and metastatic carcinoma | 3.3   | 4.1  | 4.1  | 4.2  | 4.3  | 4.6  | 5.0  | 4.8  | 5.0  | 5.4  | 5.3  | 5.5  | 5.9  | 5.9  | 5.9  | 5.8  | 6.3  | 6.2  | 6.3  | 6.1  | 6.1  |
| Cerebrovascular disease         | 9.6   | 11.2 | 10.7 | 10.8 | 11.0 | 11.2 | 12.0 | 12.7 | 13.7 | 14.7 | 14.9 | 14.7 | 12.2 | 11.5 | 11.4 | 11.8 | 11.9 | 11.1 | 10.9 | 10.4 | 10.4 |
| Chronic pulmonary disease       | 8.3   | 9.7  | 10.8 | 11.6 | 12.7 | 13.6 | 14.8 | 16.7 | 17.8 | 18.7 | 19.5 | 20.3 | 20.3 | 20.8 | 21.6 | 21.9 | 23.1 | 23.9 | 23.9 | 24.8 | 24.8 |
| Chronic renal failure           | 1.1   | 1.3  | 1.4  | 1.6  | 1.5  | 1.4  | 1.8  | 2.2  | 2.2  | 2.4  | 2.2  | 2.4  | 2.7  | 2.7  | 3.0  | 3.2  | 3.3  | 3.7  | 3.7  | 4.9  | 4.9  |
| Congestive heart failure        | 10.9  | 12.9 | 13.6 | 14.1 | 14.9 | 16.3 | 18.0 | 19.4 | 20.2 | 21.6 | 22.4 | 22.2 | 23.2 | 23.2 | 23.2 | 23.3 | 24.1 | 25.1 | 25.4 | 25.1 | 25.1 |
| Dementia                        | 5.8   | 7.3  | 7.7  | 8.4  | 9.6  | 10.4 | 12.6 | 14.7 | 16.2 | 18.0 | 17.3 | 13.5 | 12.0 | 11.0 | 10.6 | 9.8  | 9.4  | 8.6  | 8.4  | 8.0  | 8.0  |
| Diabetes with/without sequelae  | 9.1   | 10.1 | 10.0 | 10.6 | 10.7 | 11.3 | 12.1 | 12.6 | 13.5 | 13.9 | 14.6 | 15.2 | 16.1 | 16.3 | 16.9 | 17.6 | 19.2 | 19.1 | 19.8 | 20.5 | 20.5 |
| Moderate/severe liver disease   | 0.1   | 0.1  | 0.1  | 0.1  | 0.1  | 0.1  | 0.1  | 0.2  | 0.1  | 0.2  | 0.2  | 0.2  | 0.2  | 0.2  | 0.2  | 0.2  | 0.2  | 0.3  | 0.2  | 0.2  | 0.2  |
| Paralysis                       | 1.7   | 2.1  | 2.2  | 2.0  | 2.2  | 2.5  | 2.7  | 3.0  | 3.4  | 3.5  | 3.8  | 3.4  | 1.9  | 1.6  | 1.6  | 1.5  | 1.5  | 1.3  | 1.3  | 1.2  | 1.2  |
| Peripheral vascular disease     | 1.6   | 2.0  | 2.1  | 2.1  | 2.3  | 2.4  | 2.9  | 3.3  | 3.9  | 4.4  | 4.6  | 4.8  | 5.0  | 5.3  | 5.8  | 5.8  | 6.0  | 6.3  | 6.6  | 6.5  | 6.5  |
| Rheumatologic disease           | 1.5   | 1.8  | 1.9  | 1.9  | 2.0  | 2.1  | 2.2  | 2.3  | 2.8  | 3.1  | 3.2  | 3.3  | 3.4  | 3.6  | 3.6  | 3.7  | 3.9  | 3.8  | 4.0  | 3.9  | 3.9  |
| Ulcer disease                   | 1.5   | 2.0  | 2.1  | 2.1  | 2.1  | 2.4  | 3.1  | 3.1  | 3.5  | 4.0  | 3.9  | 3.7  | 3.7  | 3.6  | 3.4  | 3.5  | 3.2  | 3.5  | 3.1  | 2.6  | 2.6  |
| Chronic liver disease/cirrhosis | 0.3   | 0.3  | 0.3  | 0.3  | 0.3  | 0.3  | 0.3  | 0.3  | 0.4  | 0.4  | 0.4  | 0.4  | 0.5  | 0.4  | 0.5  | 0.4  | 0.5  | 0.5  | 0.5  | 0.5  | 0.5  |

**eTable 3. Mortality Models**

|                                 | Men    |        |      |         |        |      |         |        |      |
|---------------------------------|--------|--------|------|---------|--------|------|---------|--------|------|
|                                 | 30 Day |        |      | 180 Day |        |      | 360-Day |        |      |
|                                 | OR     | 95% CI |      | OR      | 95% CI |      | OR      | 95% CI |      |
| <b>Year</b>                     |        |        |      |         |        |      |         |        |      |
| 1986                            | 1      |        |      | 1       |        |      | 1       |        |      |
| 1987                            | 0.93   | 0.84   | 1.04 | 0.88    | 0.82   | 0.95 | 0.87    | 0.81   | 0.93 |
| 1988                            | 0.90   | 0.81   | 1.00 | 0.84    | 0.78   | 0.91 | 0.82    | 0.77   | 0.88 |
| 1989                            | 0.89   | 0.80   | 0.99 | 0.85    | 0.79   | 0.92 | 0.86    | 0.80   | 0.92 |
| 1990                            | 0.89   | 0.80   | 0.98 | 0.82    | 0.76   | 0.88 | 0.81    | 0.75   | 0.86 |
| 1991                            | 0.90   | 0.82   | 1.00 | 0.79    | 0.74   | 0.85 | 0.79    | 0.74   | 0.85 |
| 1992                            | 0.85   | 0.77   | 0.94 | 0.79    | 0.73   | 0.85 | 0.79    | 0.74   | 0.85 |
| 1993                            | 0.88   | 0.80   | 0.97 | 0.78    | 0.72   | 0.84 | 0.75    | 0.70   | 0.81 |
| 1994                            | 0.78   | 0.70   | 0.86 | 0.72    | 0.67   | 0.77 | 0.70    | 0.65   | 0.74 |
| 1995                            | 0.85   | 0.77   | 0.94 | 0.74    | 0.69   | 0.79 | 0.72    | 0.67   | 0.77 |
| 1996                            | 0.87   | 0.79   | 0.96 | 0.72    | 0.67   | 0.77 | 0.70    | 0.66   | 0.75 |
| 1997                            | 0.85   | 0.77   | 0.94 | 0.75    | 0.69   | 0.80 | 0.72    | 0.68   | 0.77 |
| 1998                            | 0.85   | 0.77   | 0.93 | 0.78    | 0.73   | 0.84 | 0.77    | 0.72   | 0.82 |
| 1999                            | 0.85   | 0.77   | 0.93 | 0.75    | 0.70   | 0.81 | 0.75    | 0.70   | 0.80 |
| 2000                            | 0.86   | 0.78   | 0.95 | 0.74    | 0.69   | 0.79 | 0.75    | 0.70   | 0.80 |
| 2001                            | 0.88   | 0.79   | 0.96 | 0.80    | 0.74   | 0.86 | 0.78    | 0.73   | 0.83 |
| 2002                            | 0.88   | 0.80   | 0.97 | 0.79    | 0.73   | 0.84 | 0.76    | 0.71   | 0.81 |
| 2003                            | 0.84   | 0.76   | 0.92 | 0.76    | 0.71   | 0.82 | 0.75    | 0.70   | 0.80 |
| 2004                            | 0.79   | 0.72   | 0.87 | 0.72    | 0.67   | 0.78 | 0.70    | 0.66   | 0.75 |
| 2005                            | 0.76   | 0.69   | 0.84 | 0.67    | 0.62   | 0.72 | 0.53    | 0.49   | 0.56 |
| <b>Age</b>                      |        |        |      |         |        |      |         |        |      |
| 65-74                           | 1      |        |      | 1       |        |      | 1       |        |      |
| 75-84                           | 1.57   | 1.49   | 1.64 | 1.64    | 1.59   | 1.70 | 1.63    | 1.59   | 1.68 |
| >=84                            | 2.70   | 2.58   | 2.83 | 2.90    | 2.80   | 2.99 | 2.93    | 2.85   | 3.02 |
| <b>Region</b>                   |        |        |      |         |        |      |         |        |      |
| Northeast                       | 1      |        |      | 1       |        |      | 1       |        |      |
| Midwest                         | 1.09   | 1.04   | 1.14 | 0.98    | 0.95   | 1.01 | 0.97    | 0.94   | 1.00 |
| South                           | 1.08   | 1.04   | 1.12 | 1.06    | 1.02   | 1.09 | 1.05    | 1.02   | 1.08 |
| West                            | 1.07   | 1.02   | 1.13 | 1.04    | 1.00   | 1.08 | 1.03    | 1.00   | 1.07 |
| <b>Race</b>                     |        |        |      |         |        |      |         |        |      |
| White                           | 1      |        |      | 1       |        |      | 1       |        |      |
| Black                           | 0.77   | 0.71   | 0.83 | 1.02    | 0.97   | 1.07 | 1.08    | 1.03   | 1.14 |
| Other                           | 0.88   | 0.80   | 0.97 | 0.96    | 0.90   | 1.03 | 1.01    | 0.95   | 1.08 |
| <b>Comorbidities</b>            |        |        |      |         |        |      |         |        |      |
| Acute/old Myocardial Infarction | 1.43   | 1.37   | 1.50 | 1.25    | 1.20   | 1.29 | 1.21    | 1.16   | 1.25 |
| Congestive Heart Failure        | 1.93   | 1.87   | 1.99 | 2.02    | 1.97   | 2.07 | 2.09    | 2.04   | 2.14 |
| Peripheral vascular disease     | 0.89   | 0.84   | 0.94 | 1.04    | 1.00   | 1.09 | 1.10    | 1.06   | 1.14 |
| Cerebrovascular disease         | 1.15   | 1.10   | 1.20 | 1.20    | 1.16   | 1.24 | 1.23    | 1.19   | 1.27 |
| Chronic pulmonary disease       | 1.33   | 1.29   | 1.37 | 1.42    | 1.39   | 1.45 | 1.49    | 1.46   | 1.53 |
| Dementia                        | 1.30   | 1.24   | 1.35 | 1.72    | 1.67   | 1.78 | 1.87    | 1.81   | 1.93 |
| Paralysis                       | 0.72   | 0.65   | 0.79 | 0.75    | 0.70   | 0.80 | 0.76    | 0.72   | 0.81 |
| Cancer and metastatic carcinoma | 1.34   | 1.29   | 1.40 | 1.87    | 1.81   | 1.93 | 2.13    | 2.07   | 2.20 |
| Diabetes with/without sequelae  | 0.88   | 0.85   | 0.92 | 1.01    | 0.98   | 1.04 | 1.07    | 1.04   | 1.10 |
| Chronic renal failure           | 1.67   | 1.59   | 1.76 | 1.88    | 1.80   | 1.96 | 1.97    | 1.89   | 2.06 |

|                                 |               |               |      |                |               |      |                |               |      |
|---------------------------------|---------------|---------------|------|----------------|---------------|------|----------------|---------------|------|
| Chronic liver disease/cirrhosis | 1.53          | 1.32          | 1.77 | 1.68           | 1.50          | 1.88 | 1.76           | 1.58          | 1.96 |
| Moderate/severe liver disease   | 2.07          | 1.69          | 2.53 | 2.37           | 2.01          | 2.80 | 2.59           | 2.19          | 3.07 |
| Ulcer disease                   | 0.89          | 0.82          | 0.96 | 1.09           | 1.03          | 1.15 | 1.10           | 1.05          | 1.16 |
| Rheumatologic disease           | 0.78          | 0.69          | 0.87 | 0.87           | 0.80          | 0.94 | 0.91           | 0.84          | 0.98 |
| <b>Women</b>                    |               |               |      |                |               |      |                |               |      |
|                                 | <b>30 Day</b> |               |      | <b>180 Day</b> |               |      | <b>360 Day</b> |               |      |
|                                 | <b>OR</b>     | <b>95% CI</b> |      | <b>OR</b>      | <b>95% CI</b> |      | <b>OR</b>      | <b>95% CI</b> |      |
| 1986                            | 1             |               |      | 1              |               |      | 1              |               |      |
| 1987                            | 0.94          | 0.87          | 1.01 | 0.98           | 0.93          | 1.03 | 0.97           | 0.93          | 1.01 |
| 1988                            | 0.97          | 0.90          | 1.05 | 0.96           | 0.91          | 1.00 | 0.94           | 0.90          | 0.98 |
| 1989                            | 0.91          | 0.85          | 0.98 | 0.92           | 0.88          | 0.97 | 0.91           | 0.88          | 0.95 |
| 1990                            | 0.89          | 0.82          | 0.95 | 0.88           | 0.84          | 0.92 | 0.85           | 0.82          | 0.89 |
| 1991                            | 0.89          | 0.83          | 0.96 | 0.83           | 0.79          | 0.87 | 0.83           | 0.80          | 0.87 |
| 1992                            | 0.88          | 0.82          | 0.94 | 0.85           | 0.81          | 0.89 | 0.84           | 0.81          | 0.88 |
| 1993                            | 0.90          | 0.84          | 0.96 | 0.83           | 0.79          | 0.87 | 0.82           | 0.79          | 0.86 |
| 1994                            | 0.84          | 0.78          | 0.90 | 0.81           | 0.78          | 0.85 | 0.80           | 0.77          | 0.83 |
| 1995                            | 0.84          | 0.78          | 0.90 | 0.80           | 0.77          | 0.84 | 0.81           | 0.77          | 0.84 |
| 1996                            | 0.87          | 0.81          | 0.93 | 0.81           | 0.77          | 0.85 | 0.81           | 0.77          | 0.84 |
| 1997                            | 0.83          | 0.77          | 0.89 | 0.82           | 0.78          | 0.86 | 0.82           | 0.79          | 0.86 |
| 1998                            | 0.89          | 0.83          | 0.95 | 0.88           | 0.85          | 0.93 | 0.88           | 0.85          | 0.92 |
| 1999                            | 0.89          | 0.83          | 0.96 | 0.90           | 0.86          | 0.94 | 0.90           | 0.86          | 0.94 |
| 2000                            | 0.85          | 0.79          | 0.91 | 0.87           | 0.83          | 0.91 | 0.89           | 0.86          | 0.93 |
| 2001                            | 0.91          | 0.85          | 0.98 | 0.93           | 0.89          | 0.97 | 0.92           | 0.88          | 0.96 |
| 2002                            | 0.94          | 0.88          | 1.01 | 0.97           | 0.93          | 1.02 | 0.94           | 0.91          | 0.98 |
| 2003                            | 0.92          | 0.85          | 0.98 | 0.94           | 0.90          | 0.98 | 0.92           | 0.89          | 0.96 |
| 2004                            | 0.87          | 0.81          | 0.93 | 0.89           | 0.85          | 0.93 | 0.89           | 0.85          | 0.93 |
| 2005                            | 0.87          | 0.81          | 0.94 | 0.82           | 0.79          | 0.86 | 0.66           | 0.63          | 0.69 |
| Age                             |               |               |      |                |               |      |                |               |      |
| 65-74                           | 1             |               |      | 1              |               |      | 1              |               |      |
| 75-84                           | 1.47          | 1.41          | 1.53 | 1.45           | 1.41          | 1.49 | 1.45           | 1.42          | 1.49 |
| >=84                            | 2.65          | 2.54          | 2.76 | 2.69           | 2.62          | 2.75 | 2.69           | 2.64          | 2.75 |
| <b>Region</b>                   |               |               |      |                |               |      |                |               |      |
| Northeast                       | 1             |               |      | 1              |               |      | 1              |               |      |
| Midwest                         | 1.09          | 1.05          | 1.12 | 1.00           | 0.98          | 1.02 | 1.01           | 0.99          | 1.02 |
| South                           | 1.04          | 1.01          | 1.07 | 1.03           | 1.01          | 1.05 | 1.04           | 1.02          | 1.06 |
| West                            | 1.14          | 1.10          | 1.18 | 1.09           | 1.07          | 1.12 | 1.11           | 1.08          | 1.13 |
| <b>Race</b>                     |               |               |      |                |               |      |                |               |      |
| White                           | 1             |               |      | 1              |               |      | 1              |               |      |
| Black                           | 0.90          | 0.84          | 0.95 | 1.13           | 1.09          | 1.17 | 1.19           | 1.15          | 1.23 |
| Other                           | 0.94          | 0.88          | 1.01 | 1.00           | 0.96          | 1.05 | 1.00           | 0.96          | 1.05 |
| <b>Comorbidities</b>            |               |               |      |                |               |      |                |               |      |
| Acute/old Myocardial Infarction | 1.71          | 1.65          | 1.77 | 1.42           | 1.39          | 1.46 | 1.35           | 1.32          | 1.38 |
| Congestive Heart Failure        | 2.33          | 2.27          | 2.38 | 2.27           | 2.24          | 2.31 | 2.26           | 2.23          | 2.29 |
| Peripheral vascular disease     | 1.04          | 0.99          | 1.09 | 1.21           | 1.17          | 1.25 | 1.29           | 1.25          | 1.32 |
| Cerebrovascular disease         | 1.33          | 1.29          | 1.38 | 1.37           | 1.34          | 1.40 | 1.36           | 1.34          | 1.39 |
| Chronic pulmonary disease       | 1.37          | 1.34          | 1.41 | 1.45           | 1.43          | 1.48 | 1.52           | 1.49          | 1.54 |
| Dementia                        | 1.20          | 1.17          | 1.24 | 1.56           | 1.53          | 1.59 | 1.65           | 1.62          | 1.68 |
| Paralysis                       | 0.89          | 0.82          | 0.95 | 0.96           | 0.91          | 1.00 | 1.02           | 0.97          | 1.06 |
| Cancer and metastatic carcinoma | 1.92          | 1.85          | 2.00 | 3.04           | 2.96          | 3.11 | 3.45           | 3.37          | 3.53 |

|                                 |      |      |      |      |      |      |      |      |      |
|---------------------------------|------|------|------|------|------|------|------|------|------|
| Diabetes with/without sequelae  | 0.94 | 0.91 | 0.97 | 1.09 | 1.07 | 1.11 | 1.15 | 1.13 | 1.17 |
| Chronic renal failure           | 2.10 | 2.00 | 2.21 | 2.32 | 2.24 | 2.41 | 2.40 | 2.32 | 2.49 |
| Chronic liver disease/cirrhosis | 1.64 | 1.43 | 1.87 | 2.12 | 1.93 | 2.32 | 2.26 | 2.07 | 2.46 |
| Moderate/severe liver disease   | 3.05 | 2.58 | 3.59 | 3.22 | 2.83 | 3.66 | 3.23 | 2.84 | 3.66 |
| Ulcer disease                   | 0.94 | 0.88 | 0.99 | 1.06 | 1.02 | 1.10 | 1.07 | 1.04 | 1.11 |
| Rheumatologic disease           | 0.81 | 0.75 | 0.87 | 0.97 | 0.93 | 1.02 | 1.03 | 1.00 | 1.07 |
